# Supplementary material for: Electronic, charge and magnetic interactions in three-centre systems
Source: Royal Society of Chemistry journal article supplement (doi:10.1039/c5tc00658a), 2015-01-01
Supplement: c5tc00658a1.pdf [file c5tc00658a1.pdf]

## **Electronic, charge and magnetic interactions in three-centre systems**

Alexa Paretzki, Ralph Hübner, Shengfa Ye, Martina Bubrin, Sara Kämper and Wolfgang  
Kaim\*

### **Supporting Information**

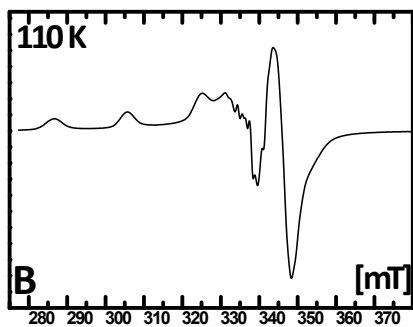

**Figure S1.** X-Band EPR spectrum of **4** at 110 K in dichloromethane/toluene (1:1).

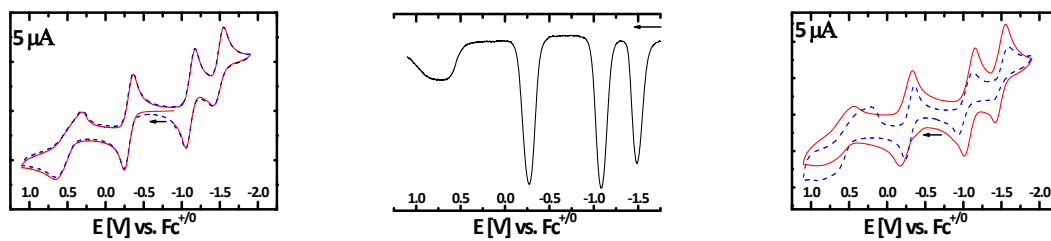

**Figure S2.** Cyclic voltammograms of **3** at 100 mV/s in CH<sub>2</sub>Cl<sub>2</sub>/0.1 M Bu<sub>4</sub>NPF<sub>6</sub> at 298 K (left), differential pulse voltammogram (centre) and cyclic voltammograms at 248 K and (--) 233 K (100 mV/s, right).

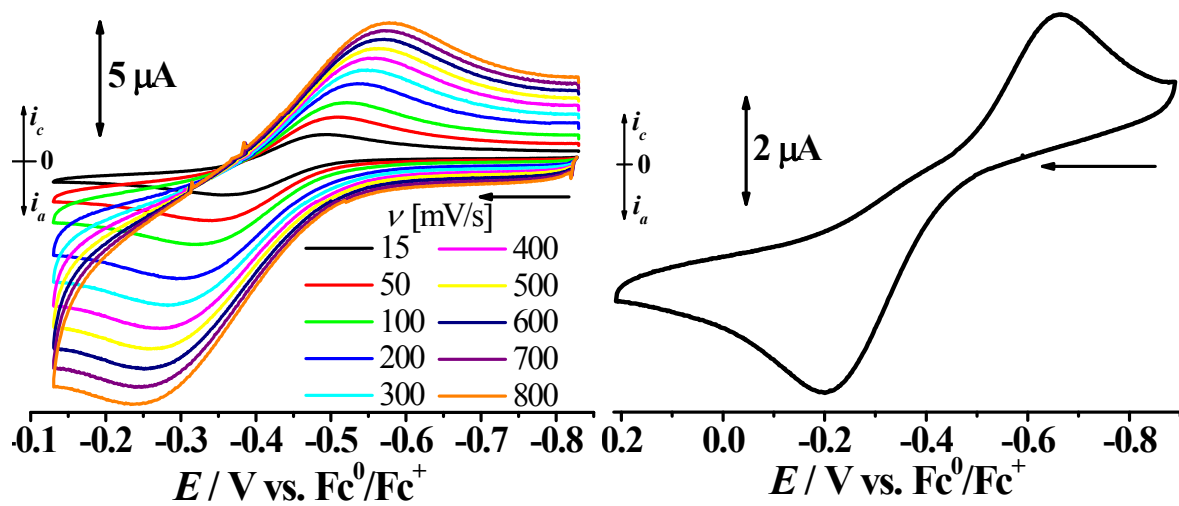

**Figure S3.** Cyclic voltammograms of the first oxidation of **5** at 298 K at different scan rates (left) and at 233 K with 100 mV/s scan rate (right).

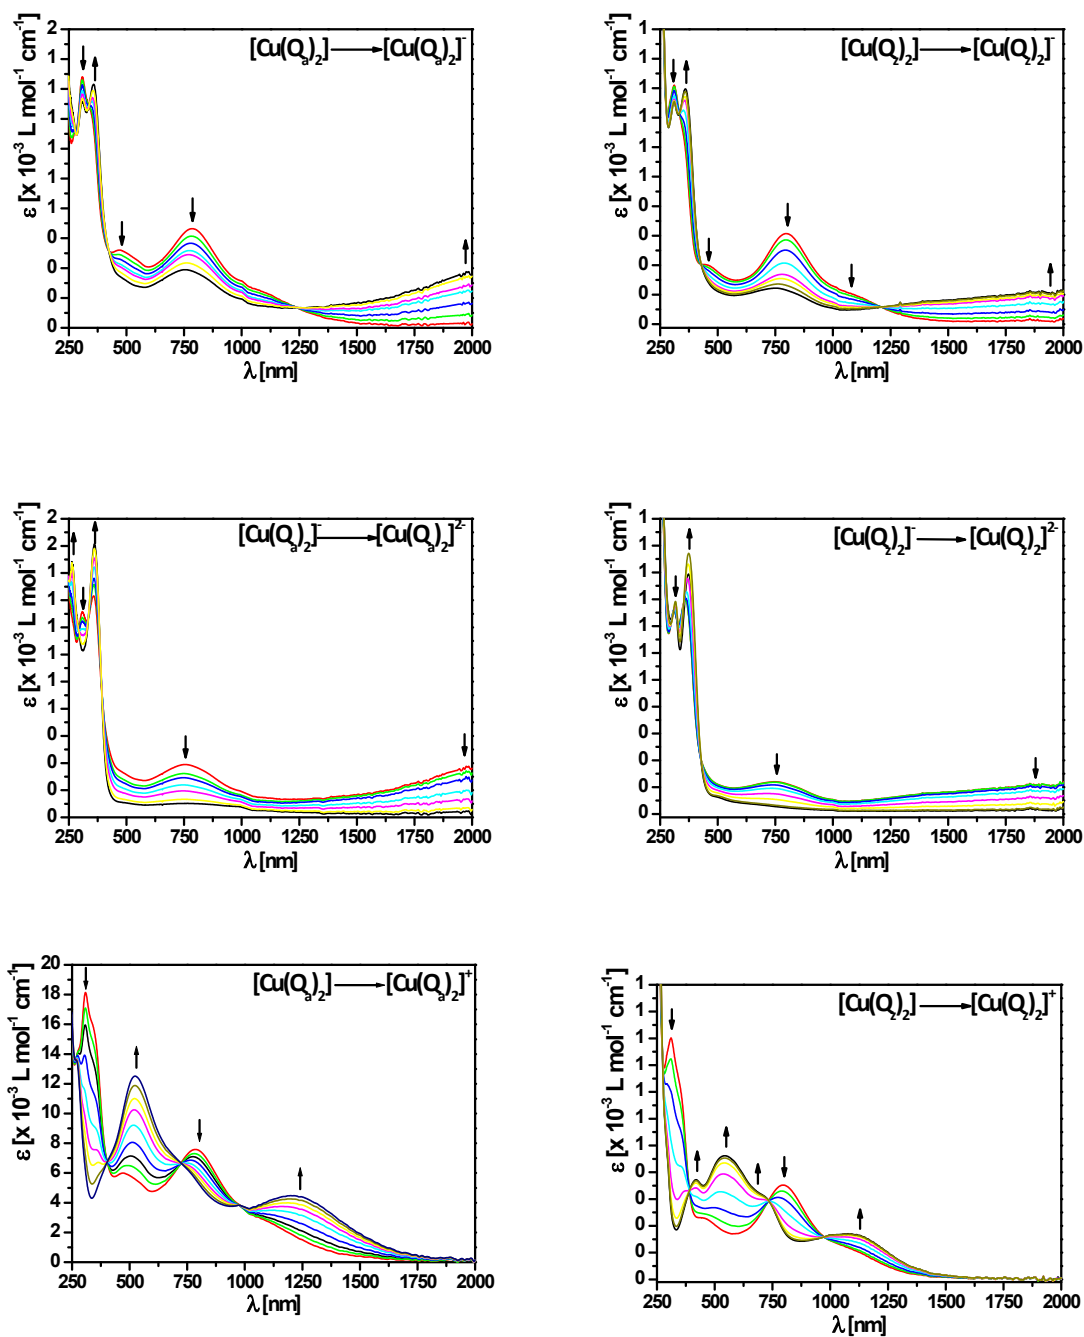

**Figure S4.** UV/Vis/NIR spectroelectrochemistry in  $\text{CH}_2\text{Cl}_2/0.1 \text{ M Bu}_4\text{NPF}_6$ . Top: first reduction of **3** (left) and **4** (right). Centre: Second reduction of **3** (left) and **4** (right). Bottom: first oxidation of **3** (left) and **4** (right).
